# Supplementary material for: Preliminary evidence on the uptake, use and benefits of the CONSORT-PRO extension
Source: Springer Nature journal article supplement (doi:10.1007/s11136-017-1508-6), 2017-02-06
Supplement: MOESM3 [file 12051388]

**Appendix 3**. Cases and controls included in this review

Cases

| Year | First Author | RCT title | Journal |
| --- | --- | --- | --- |
| 2013 | Sandercock | Effect of thrombolysis with alteplase within 6 h of acute ischaemic stroke on long-term outcomes (the third International Stroke Trial [IST-3]): 18-month follow-up of a randomised controlled trial | Lancet Neurology |
| 2014 | Dragoo | Platelet-Rich Plasma as a Treatment for Patellar Tendinopathy A Double-Blind, Randomized Controlled Trial | American Journal of Sports Medicine |
| 2014 | Fayed | Changes in Metabolites after Treatment with Memantine in Fibromyalgia. A Double-Blind Randomized Controlled Trial with Magnetic Resonance Spectroscopy with a 6-month Follow-up | CNS Neuro Ther |
| 2014 | Troeger | Quality of Life of Patients With Advanced Pancreatic Cancer During Treatment With Mistletoe A randomized controlled trial | Deutsches Ärzteblatt International |
| 2014 | Troeger | Additional Therapy with a Mistletoe Product during Adjuvant Chemotherapy of Breast Cancer Patients Improves Quality of Life: An Open Randomized Clinical Pilot Trial | Evidence-Based Complementary and Alternative Medicine |
| 2014 | Efficace | Randomized Phase III Trial of Retinoic Acid and Arsenic Trioxide Versus Retinoic Acid and Chemotherapy in Patients With Acute Promyelocytic Leukemia: Health-Related Quality-of-Life Outcomes | Journal of Clinical Oncology |
| 2014 | Eijzenga | Effect of Routine Assessment of Specific Psychosocial Problems on Personalized Communication, Counselors' Awareness, and Distress Levels in Cancer Genetic Counseling Practice: A Randomized Controlled Trial | Journal of Clinical Oncology |
| 2014 | Ford | Docetaxel versus active symptom control for refractory oesophagogastric adenocarcinoma (COUGAR-02): an open-label, phase 3 randomised controlled trial | Lancet Oncology |
| 2014 | Dimopoulos | Factors that influence health-related quality of life in newly diagnosed patients with multiple myeloma aged >= 65 years treated with melphalan, prednisone and lenalidomide followed by lenalidomide maintenance: results of a randomized trial | Leukemia & Lymphoma |
| 2014 | Luciano | Effectiveness of group acceptance and commitment therapy for fibromyalgia: A 6-month randomized controlled trial (EFFIGACT study) | Pain |
| 2014 | Olivan-Blazquez | Efficacy of memantine in the treatment of fibromyalgia: A double-blind, randomised, controlled trial with 6-month follow-up | Pain |
| 2014 | Muggia | Brief group cognitive behavioral treatment in addition to prescriptive diet versus standard care in obese and overweight patients. A randomized controlled trial. | e-SPEN Journal |
| 2014 | Jensen | Multidisciplinary rehabilitation can impact on health-related quality of life outcome in radical cystectomy: secondary reported outcome of a randomized controlled trial. | J Multidiscip Healthc |
| 2015 | Coens | Health-related quality-of-life results from PALETTE: A randomized, double-blind, phase 3 trial of pazopanib versus placebo in patients with soft tissue sarcoma whose disease has progressed during or after prior chemotherapya European Organization for research and treatment of cancer soft tissue and bone sarcoma group global network study (EORTC 62072) | Cancer |
| 2015 | Eijzenga | Routine assessment of psychosocial problems after cancer genetic counseling: results from a randomized controlled trial (pages 419–427) | Clinical Genetics |
| 2015 | Dirven | The impact of bevacizumab on health-related quality of life in patients treated for recurrent glioblastoma: Results of the randomised controlled phase 2 BELOB trial | European Journal of Cancer |
| 2015 | Bochner | Comparing Open Radical Cystectomy and Robot-assisted Laparoscopic Radical Cystectomy: A Randomized Clinical Trial | European Urology |
| 2015 | Brittenden | Clinical effectiveness and cost-effectiveness of foam sclerotherapy, endovenous laser ablation and surgery for varicose veins: results from the Comparison of LAser, Surgery and foam Sclerotherapy (CLASS) randomised controlled trial | Health Technology Assessment |
| 2015 | Simpson | A feasibility randomised controlled trial of a motivational interviewing-based intervention for weight loss maintenance in adults | Health Technology Assessment |
| 2015 | Wagner | Anxiety and Health-Related Quality of Life Among Patients With Low-Tumor Burden Non-Hodgkin Lymphoma Randomly Assigned to Two Different Rituximab Dosing Regimens: Results From ECOG Trial E4402 (RESORT) | Journal of Clinical Oncology |
| 2015 | Brundage | Impact of Radiotherapy When Added to Androgen-Deprivation Therapy for Locally Advanced Prostate Cancer: Long-Term Quality-of-Life Outcomes From the NCIC CTG PR3/MRC PR07 Randomized Trial | Journal of Clinical Oncology |
| 2015 | Sletten | Conservative treatment has comparable outcome with bouquet pinning of little finger metacarpal neck fractures: a multicentre randomized controlled study of 85 patients | Journal of Hand Surgery - European Volume |
| 2015 | Eijzenga | Effect of Routine Assessment of Specific Psychosocial Problems on Personalized Communication, Counselors’ Awareness, and Distress Levels in Cancer Genetic Counseling Practice: A Randomized Controlled Trial | JCO |
| 2015 | Vermandere | Spiritual history taking in palliative home care: A cluster randomized controlled trial. | Palliat Med. |
| 2015 | Biddle | A Randomised Controlled Trial to Reduce Sedentary Time in Young Adults at Risk of Type 2 Diabetes Mellitus: Project STAND (Sedentary Time ANd Diabetes). | PLoS One. |
| 2015 | van Beers | Clear instructions reduce missing responses in pen-and-paper collected Patient Reported Outcome Measures: A randomized study | Nederlands Tijdschrift voor Orthopaedie |

Controls

| Year | First Author | RCT title | Journal |
| --- | --- | --- | --- |
| 2012 | Else | Quality of life in chronic lymphocytic leukemia: 5- year results from the multicenter randomized LRF CLL4 trial | Leukemia & Lymphoma |
| 2013 | Bottomley | An International Phase 3 Trial in Head and Neck Cancer: Quality of Life and Symptom Results | Cancer |
| 2013 | Pirl | Depression, survival, and epidermal growth factor receptor genotypes in patients with metastatic non-small cell lung cancer | Palliative and Supportive Care |
| 2014 | Abrams | Arthroscopic Repair of Full-Thickness Rotator Cuff Tears With and Without Acromioplasty: Randomized Prospective Trial With 2-Year Follow-up | American Journal of Sports Medicine |
| 2014 | Shariff | Platelet-Rich Plasma Injections for the Treatment of Hamstring Injuries: A Randomized Controlled trial | American Journal of Sports Medicine |
| 2014 | Wang | Recurrent Stroke was Associated with Poor Quality of Life in Patients with Transient Ischemic Attack or Minor Stroke: Finding from the CHANCE Trial | CNS Neuro Ther |
| 2014 | Losada-Camacho | Impact of a pharmaceutical care programme on health-related quality of life among women with epilepsy: a randomised controlled trial (IPHIWWE study) | HQLO |
| 2014 | Bartl | The Treatment of Displaced Intra-articular Distal Radius Fractures in Elderly Patients A Randomized Multi-center Study (ORCHID) of Open Reduction and Volar Locking Plate Fixation Versus Closed Reduction and Cast Immobilization | Deutsches Ärzteblatt International |
| 2014 | Blackhall | Patient-Reported Outcomes and Quality of Life in PROFILE 1007: A Randomized Trial of Crizotinib Compared with Chemotherapy in Previously Treated Patients with ALK-Positive Advanced Non–Small-Cell Lung Cancer | J Thorac Oncol. |
| 2014 | Goyder | A randomised controlled trial and cost-effectiveness evaluation of ‘booster’ interventions to sustain increases in physical activity in middle-aged adults in deprived urban neighbourhoods | Health Technology Assessment |
| 2014 | Maunsell | Quality of Life in MAP.3 (Mammary Prevention 3): A Randomized, Placebo-Controlled Trial Evaluating Exemestane for Prevention of Breast Cancer | Journal of Clinical Oncology |
| 2014 | Schwartz | Randomized Noninferiority Trial of Telephone Versus In-Person Genetic Counseling for Hereditary Breast and Ovarian Cancer | Journal of Clinical Oncology |
| 2014 | Fizazi | Eff ect of enzalutamide on time to fi rst skeletal-related event, pain, and quality of life in men with castration-resistant prostate cancer: results from the randomised, phase 3 AFFIRM trial | Lancet Oncology |
| 2014 | Broderick | Nurse practitioners can effectively deliver pain coping skills training to osteoarthritis patients with chronic pain: A randomized, controlled trial | Pain |
| 2014 | de Vos | Spinal cord stimulation in patients with painful diabetic neuropathy: A multicentre randomized clinical trial | Pain |
| 2014 | Knutsen | Effect of vitamin D on musculoskeletal pain and headache: A randomized, double-blind, placebo-controlled trial among adult ethnic minorities in Norway | Pain |
| 2014 | Young | The glycemic load of meals, cognition and mood in middle and older aged adults with differences in glucose tolerance: A randomized trial | e-SPEN journal |
| 2015 | Park | The effect of oncologists' exercise recommendations on the level of exercise and quality of life in survivors of breast and colorectal cancer: A randomized controlled trial | Cancer |
| 2015 | Albert | Can Genetics Predict Response to Complex Behavioral Interventions? Evidence from a Genetic Analysis of the Fast Track Randomized Control Trial | Journal of Policy Analysis and Management |
| 2015 | Scalfani | Short- and Long-Term Quality of Life and Bowel Function in Patients With MRI-Defined, High-Risk, Locally Advanced Rectal Cancer Treated With an Intensified Neoadjuvant Strategy in the Randomized Phase 2 EXPERT-C Trial | Int J Radiation Oncol Biol Phys |
| 2015 | Biyle | Health related quality of life of women in TEACH, a randomised placebo controlled adjuvant trial of lapatinib in early stage Human Epidermal Growth Factor Receptor (HER2) overexpressing breast cancer | European Journal of Cancer |
| 2015 | Novelloa | Analysis of patient-reported outcomes from the LUME-Lung 1 trial: A randomised, double-blind, placebo-controlled, Phase III study of second-line nintedanib in patients with advanced non-small cell lung cancer | European Journal of Cancer |
| 2015 | Sonksen | Prospective, Randomized, Multinational Study of Prostatic Urethral Lift Versus Transurethral Resection of the Prostate: 12-month Results from the BPH6 Study | European Urology |
| 2015 | Khan | A Single-centre Early Phase Randomised Controlled Three-arm Trial of Open, Robotic, and Laparoscopic Radical Cystectomy (CORAL) | European Urology |
| 2015 | Charalambous | Progressive Muscle Relaxation and Guided Imagery as Anxiety Reducing Interventions in Breast and Prostate Cancer Patients Undergoing Chemotherapy | Evidence-Based Complementary and Alternative Medicine |
| 2015 | McCall | Yoga for Health-Related Quality of Life in Adult Cancer: A Randomized Controlled Feasibility Study | Evidence-Based Complementary and Alternative Medicine |
| 2015 | Clark | A randomised controlled trial of Outpatient versus inpatient Polyp Treatment (OPT) for abnormal uterine bleeding | Health Technology Assessment |
| 2015 | Ussher | The London Exercise And Pregnant smokers (LEAP) trial: a randomised controlled trial of physical activity for smoking cessation in pregnancy with an economic evaluation | Health Technology Assessment |
| 2015 | Sandercock | The Clots in Legs Or sTockings after Stroke (CLOTS) 3 trial: a randomised controlled trial to determine whether or not intermittent pneumatic compression reduces the risk of post-stroke deep vein thrombosis and to estimate its cost-effectiveness | Health Technology Assessment |
| 2015 | Taphoorn | Health-Related Quality of Life in a Randomized Phase III Study of Bevacizumab, Temozolomide, and Radiotherapy in Newly Diagnosed Glioblastoma | Journal of Clinical Oncology |
| 2015 | Borget | Quality of Life and Cost-Effectiveness Assessment of Radioiodine Ablation Strategies in Patients With Thyroid Cancer: Results From the Randomized Phase III ESTIMABL Trial | Journal of Clinical Oncology |
| 2015 | Bakitas | Early Versus Delayed Initiation of Concurrent Palliative Oncology Care: Patient Outcomes in the ENABLE III Randomized Controlled Trial | Journal of Clinical Oncology |
| 2015 | Ghadjar | Acute Toxicity and Quality of Life After Dose-Intensified Salvage Radiation Therapy for Biochemically Recurrent Prostate Cancer After Prostatectomy: First Results of the Randomized Trial SAKK 09/10 | Journal of Clinical Oncology |
| 2015 | Trenkwalder | Prolonged-release oxycodone–naloxone for treatment of severe pain in patients with Parkinson’s disease (PANDA): a double-blind, randomised, placebo-controlled trial | Lancet Neurology |
| 2015 | Barzel | Home-based constraint-induced movement therapy for patients with upper limb dysfunction after stroke (HOMECIMT): a cluster-randomised, controlled trial | Lancet Neurology |
| 2015 | Grob | Comparison of dabrafenib and trametinib combination therapy with vemurafenib monotherapy on health-related quality of life in patients with unresectable or metastatic cutaneous BRAF Val600-mutation-positive melanoma (COMBI-v): results of a phase 3, open-label, randomised trial | Lancet Oncology |
| 2015 | Lovel | Long-Term Safety, Efficacy, and Quality of Life in Patients With Juvenile Idiopathic Arthritis Treated With Intravenous Abatacept for Up to Seven Years | ARTHRITIS & RHEUMATOLOGY |
| 2015 | Dinat | Randomized, Double-Blind, Crossover Trial of Amitriptyline for Analgesia in Painful HIVAssociated Sensory Neuropathy | PLOS One |
| 2015 | Simmons | Impact of Community Based Peer Support in Type 2 Diabetes: A Cluster Randomised Controlled Trial of Individual and/or Group Approaches | PLOS One |
| 2016 | Ehrmann | Comparison of the Efficacy of a Diabetes Education Programme for Type 1 Diabetes (PRIMAS) in a Randomised Controlled Trial Setting and the Effectiveness in a Routine Care Setting: Results of a Comparative Effectiveness Study | PLOS One |
