# Supplementary material for: Preliminary evidence on the uptake, use and benefits of the CONSORT-PRO extension
Source: Springer Nature journal article supplement (doi:10.1007/s11136-017-1508-6), 2017-02-06
Supplement: MOESM4 [file 12051388]

**Appendix 4. 100 Top-ranked journals publishing a RCT with a PRO endpoint in 2014-2015**

| **Rank** | **Journal** | **Impact factor*** |
| --- | --- | --- |
|  | The New England Journal Of Medicine | 55.873 |
|  | The Lancet | 45.217 |
|  | Journal Of The American Medical Association | 35.289 |
|  | The Lancet Oncology | 24.69 |
|  | The Lancet Neurology | 21.896 |
|  | Journal Of Clinical Oncology | 18.443 |
|  | Annals Of Internal Medicine | 17.81 |
|  | Gastroenterology | 16.716 |
|  | Journal Of The American College Of Cardiology | 16.503 |
|  | European Heart Journal | 15.203 |
|  | Circulation | 15.073 |
|  | Gut | 14.66 |
|  | World Psychiatry | 14.225 |
|  | European Urology | 13.938 |
|  | Jama Internal Medicine | 13.116 |
|  | American Journal Of Respiratory & Critical Care Medicine | 12.996 |
|  | J Natl Cancer Institute | 12.583 |
|  | American Journal Of Psychiatry | 12.295 |
|  | JAMA Psychiatry | 12.008 |
|  | Journal Of Allergy And Clinical Immunology | 11.476 |
|  | Journal Of Hepatology | 11.336 |
|  | Hepathology Journal | 11.055 |
|  | The American Journal Of Gastroenterology | 10.755 |
|  | Blood | 10.452 |
|  | Annals Of The Rheumatic Diseases | 10.377 |
|  | The Lancet Respiratory Medicine | 9.629 |
|  | Journal Of The American Society Of Nephrology | 9.343 |
|  | Psychotherapy And Psychosomatics | 9.196 |
|  | Clinical Infectious Diseases | 8.886 |
|  | Diabetes Care | 8.42 |
|  | Annals Of Surgery | 8.327 |
|  | Thorax | 8.29 |
|  | Neurology | 8.185 |
|  | The British Journal Of Psychiatry | 7.991 |
|  | Clinical Gastroenterology & Hepatology | 7.896 |
|  | Arthritis & Rheumatology | 7.764 |
|  | European Respiratory Journal | 7.636 |
|  | Chest | 7.483 |
|  | BMC Medicine | 7.356 |
|  | JACC Cardiovascular Interventions | 7.345 |
|  | JAMA Neurology | 7.271 |
|  | Intensive Care Medicine | 7.214 |
|  | Annals Of Oncology | 7.04 |
|  | Radiology | 6.867 |
|  | Journal Of Neurology, Neurosurgery And Psychiatry | 6.807 |
|  | The American Journal Of Clinical Nutrition | 6.77 |
|  | European Journal Of Heart Failure | 6.526 |
|  | Journal Of Child Psychology And Psychiatry And Allied Disciplines | 6.459 |
|  | Diabetes Obesity And Metabolism | 6.36 |
|  | Journal Of Crohns & Colitis | 6.234 |
|  | Journal Of Clinical Endocrinology And Metabolism | 6.209 |
|  | Journal Of Nuclear Medicine | 6.16 |
|  | Ophthalmology | 6.135 |
|  | Allergy | 6.028 |
|  | Canadian Medical Association Journal | 5.959 |
|  | Psychological Medicine | 5.938 |
|  | Circulation Cardiovascular Quality And Outcomes | 5.906 |
|  | Am J Kidney Dis - American Journal Of Kidney Diseases | 5.9 |
|  | Circulation Heart Failure | 5.867 |
|  | Haematologica | 5.814 |
|  | Stroke | 5.761 |
|  | Alimentary Pharmacology And Therapeutics | 5.727 |
|  | Journal Of Thrombosis And Haemostasis | 5.72 |
|  | Movement Disorders | 5.68 |
|  | Acta Psychiatrica Scandinavica | 5.605 |
|  | Heart | 5.595 |
|  | British Journal Of Surgery | 5.542 |
|  | Journal Of Clinical Psychiatry | 5.498 |
|  | Pediatrics | 5.473 |
|  | The Annals Of Family Medicine | 5.434 |
|  | European Journal Of Cancer | 5.417 |
|  | The Journals Of Gerontology Series A Biological Sciences And Medical Sciences | 5.416 |
|  | Gastrointestinal Endoscopy | 5.369 |
|  | Journal Of Thoracic Oncology | 5.282 |
|  | The Journal Of Bone And Joint Surgery American Volume | 5.28 |
|  | Pain | 5.213 |
|  | Obstetrics & Gynecology | 5.175 |
|  | Journal Of The American College Of Surgeons | 5.122 |
|  | CNS Drugs | 5.113 |
|  | International Journal Of Cancer | 5.085 |
|  | Heart Rhythm | 5.076 |
|  | Cancer - American Cancer Society | 5.068 |
|  | Health Technology Assessment Winchester England | 5.027 |
|  | Brit J Sport Med - British Journal Of Sports Medicine | 5.025 |
|  | International Journal Of Obesity | 5.004 |
|  | Psychoneuroendocrinology | 4.944 |
|  | Journal Of The American Directors Association | 4.3939 |
|  | The Oncologist | 4.865 |
|  | Liver International | 4.85 |
|  | Expert Opinion On Drug Delivery | 4.84 |
|  | British Journal Of Cancer | 4.836 |
|  | Addiction | 4.829 |
|  | Multiple Sclerosis Journal | 4.822 |
|  | Clinical And Experimental Allergy | 4.769 |
|  | Arthritis Care And Research | 4.713 |
|  | American Journal Of Obstetrics And Gynecology | 4.704 |
|  | Annals Of Emergency Medicine | 4.695 |
|  | Circulation Arrhythmia And Electrophysiology | 4.678 |
|  | Hormones And Behavior | 4.632 |
|  | Clinical Journal Of The American Society Of Nephrology | 4.613 |

*Impact factors ranked according to Thomson Reuters 2014 Journal Citation Reports Science Edition http://admin-apps.webofknowledge.com.proxy.queensu.ca/JCR/JCR?PointOfEntry=Home&SID=3C5UmgmjnhOGsy9bXch
